# Supplementary material
Source: publisher figshare collection journal article supplement (https://frontiersin.figshare.com/ndownloader/files/14788451)
Supplement: Supplementary file [file 14788451]

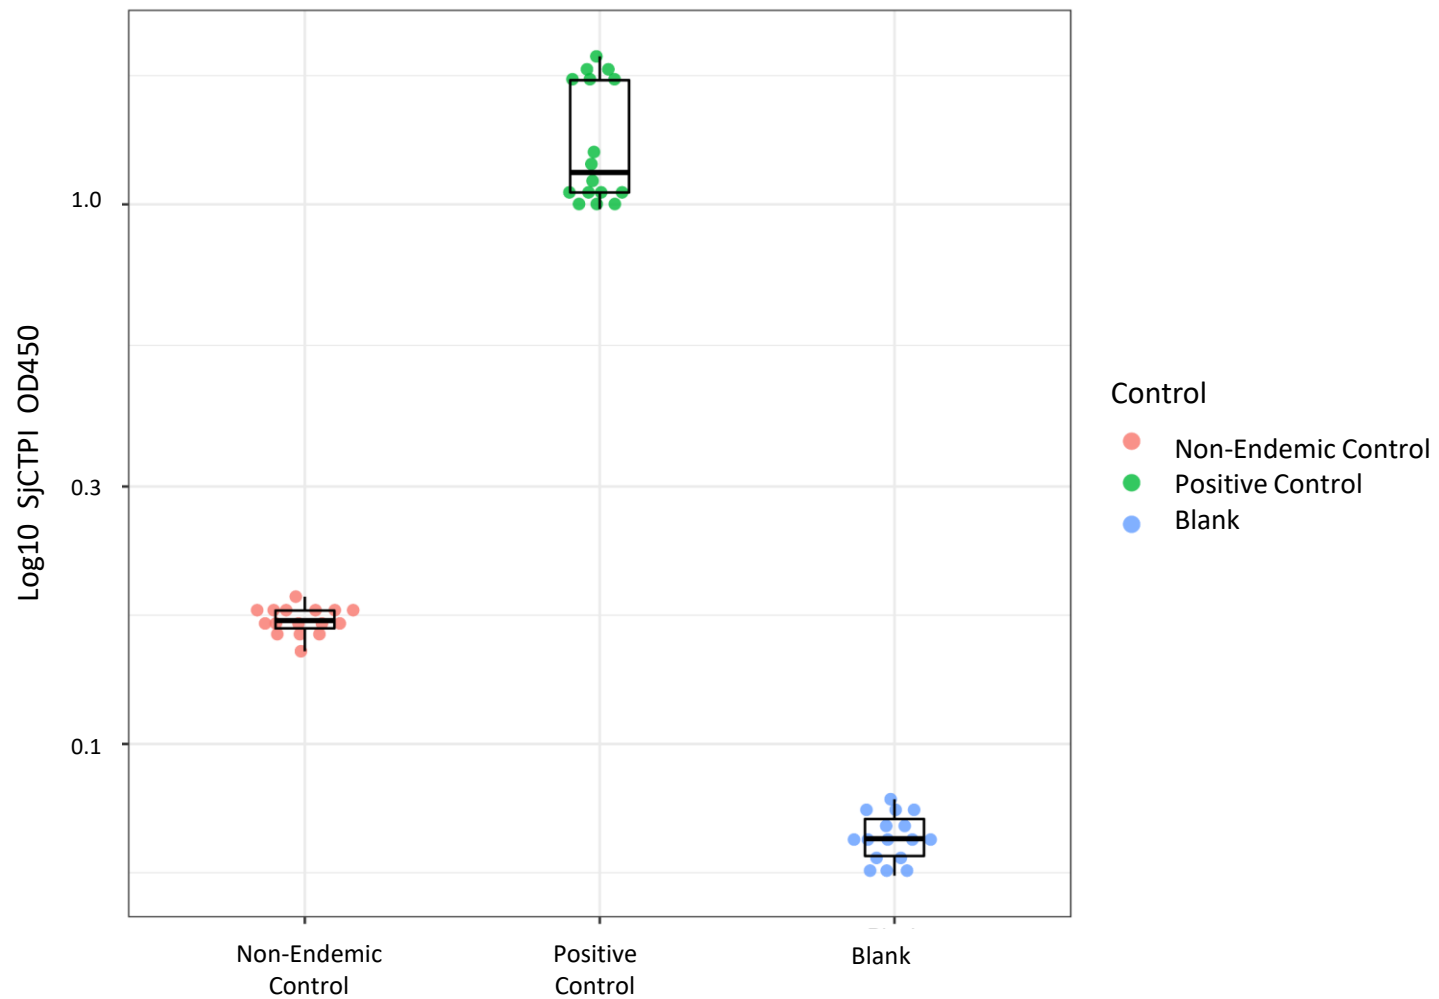

**Supplementary Figure 2: Anti-SjCTPI antibody OD<sub>450</sub> levels in control bovine serum samples.** The anti-SjCTPI IgG antibody levels (OD<sub>450</sub>) were measured in highly reactive sera collected from bovines in schistosomiasis endemic areas (Positive Controls), sera collected from bovines in non-endemic areas (Non-Endemic Controls) and blank wells by indirect ELISA. The box and whisker plot display the median (central horizontal line), first and third quartiles (bottom and top of box, respectively; inter-quartile range), and values within 1.5 times the inter-quartile range of the first and third quartiles (vertical lines).
